# Supplementary material for: Evaluating the Impact of Engineering Works in Tidal Flats Using Time-Series Satellite Images – Case of the Mont-Saint-Michel Bay, France
Source: Preprints.org preprint supplement (doi:10.20944/preprints202305.1982.v1), 2023-05-29
Supplement: Supplementary file 1 [file supplementary]

## Sheet: Feuil1
DATE	UTC	Satellite	predicted height	corrected height	Place in the tidal cycle increasing (I) decreasing (D)	ebb (E) flood (F)	minutes vs low tide	French tide coefficient	atmosph. Pressure (hPa) MeteoFrance
19900927	10:19:00	L4-TM	9.29	9.11	D	E	-418	30	1031
19950504	10:07:00	L4-TM	10.18	10.09	D	E	-317	68	1022
20000407	11:33:00	Aster	6.47	6.61	D	E	-212	101	999
20040909	11:16:00	Aster	7.35	7.28	I	F	190	25	1020
20060830	11:16:00	Aster	9.54	9.44	D	E	-296	60	1023
20071024	11:12:00	VNIR-2	2.56	2.47	I	E	-3	81	1022
20120503	11:10:00	Aster	3.31	3.33	I	F	50	69	1011
20130902	11:17:00	Aster	4.06	3.89	I	F	28	53	1030
20150801	11:11:00	S2A	4.9	4.85	I	E	-155	98	1018
20150818	11:01:00	S2A	8.18	8.15	D	E	-244	80	1016
20150821	11:11:00	S2A	9.98	9.9	D	E	-315	58	1021
20150910	11:11:00	S2A	3.51	3.47	I	F	4	62	1017
20150930	11:11:00	S2A	6.33	6.2	D	E	-213	116	1026
20151209	11:15:00	S2A	3.15	2.9	I	E	-15	67	1038
20151229	11:15:00	S2A	8.72	8.62	D	E	-273	82	1023
20160105	11:05:00	S2A	6.59	6.83	I	F	141	40	989
20160315	11:01:00	S2A	11.24	11.11	D	E	-396	65	1026
20160318	11:11:00	S2A	6.18	6.07	I	F	136	45	1024
20160504	10:56:00	S2A	2.38	2.34	D	F	10	78	1017
20160706	11:07:00	S2A	6.4	6.29	D	E	-202	94	1024
20160716	11:06:00	S2A	4.65	4.5	I	F	64	47	1028
20160812	10:56:00	S2A	8.84	8.7	D	F	267	35	1027
20160815	11:07:00	S2A	4.27	4.19	I	F	40	50	1021
20160822	10:57:00	S2A	10.12	9.98	D	E	-294	97	1027
20160901	10:56:00	S2A	4.26	4.13	I	E	-134	88	1026
20161031	11:02:00	S2A	4.5	4.39	hws	E	-139	85	1024
20161103	11:12:00	S2A	7.21	7.12	D	E	-218	76	1022
20161130	11:04:00	S2A	4.78	4.56	hws	E	-143	81	1035
20170119	11:04:00	S2A	10.56	10.36	D	E	-386	54	1033
20170218	11:01:00	S2A	10.15	10.03	D	E	-373	47	1025
20170313	11:09:00	S2A	4.9	4.72	hws	E	-170	97	1031
20170409	10:57:00	S2A	3	2.92	I	E	-73	80	1021
20170509	10:56:00	S2A	3.28	3.21	I	E	-81	78	1020
20170522	11:06:00	S2A	4.42	4.4	I	F	89	60	1015
20170618	10:56:00	S2A	9.49	9.4	dws	F	266	50	1022
20170621	11:07:00	S2A	3.45	3.44	I	F	59	79	1014
20170706	11:06:00	S2B	3.65	3.65	I	F	5	57	1013
20170827	10:57:00	S2A	10.53	10.49	D	E	-326	69	1017
20171113	11:13:00	S2B	7.05	6.91	I	F	157	53	1027
20180221	11:11:00	S2B	10.32	10.21	D	E	-319	76	1024
20180226	11:10:00	S2A	5.4	5.28	I	F	107	53	1025
20180417	11:07:00	S2A	5.32	5.23	hws	E	-185	100	1022
20180419	10:56:00	S2B	9.05	8.95	I	E	-269	95	1023
20180422	11:06:00	S2B	10.7	10.71	D	E	-383	60	1012
20180424	10:57:00	S2A	8.02	7.96	I	F	208	49	1019
20180504	10:56:00	S2A	9.03	8.93	D	E	-271	71	1023
20180507	11:06:00	S2A	9.39	9.35	D	E	-353	39	1017
20180517	11:06:00	S2A	6.23	6.12	D	E	-205	100	1024
20180519	10:56:00	S2B	10.09	9.99	D	E	-296	89	1023
20180524	11:01:00	S2A	6.5	6.45	I	F	152	55	1018
20180623	10:56:00	S2A	5.57	5.41	I	F	120	55	1029
20180626	11:06:00	S2A	3.31	3.21	I	E	-42	68	1023
20180628	10:56:00	S2B	4.67	4.6	I	E	-131	74	1020
20180708	10:56:00	S2B	7.82	7.7	I	F	198	47	1025
20180723	10:56:00	S2A	5.36	5.31	I	F	98	47	1018
20180802	10:56:00	S2A	10.04	9.94	D	E	-309	69	1023
20180901	10:56:00	S2A	10.4	10.28	D	E	-326	70	1025
20180906	10:57:00	S2B	5.15	5.1	I	F	94	53	1018
20180926	11:00:00	S2B	5.34	5.14	I	E	-175	90	1033
20180929	11:08:00	S2B	8.81	8.68	D	E	-266	84	1026
20181004	11:09:00	S2A	8.22	8.1	I	F	-211	45	1025
20181009	11:10:00	S2B	3.51	3.45	I	E	-125	105	1019
20181021	11:01:00	S2A	3.9	3.75	I	F	18	57	1028
20181103	11:12:00	S2A	6.36	6.23	I	F	136	56	1026
20181108	11:13:00	S2B	4.06	4.04	hws	E	-137	97	1015
20181113	11:13:00	S2A	9.25	9.12	D	E	-290	56	1026
20181118	11:14:00	S2B	6.79	6.72	I	F	145	39	1020
20181130	11:04:00	S2A	10.64	10.65	D	F	309	60	1012
20190104	11:05:00	S2B	10.12	9.83	D	E	-351	45	1042
20190203	11:03:00	S2B	3.85	3.71	I	E	-78	69	1027
20190213	11:02:00	S2B	10.14	9.93	D	F	324	43	1034
20190223	11:01:00	S2B	10.51	10.32	D	E	-324	104	1032
20190226	11:11:00	S2B	10.86	10.69	D	E	-397	57	1030
20190323	11:07:00	S2A	7.5	7.33	D	E	-239	113	1030
20190330	10:57:00	S2A	6.91	6.84	I	F	174	31	1020
20190412	11:06:00	S2A	10.15	10.04	D	E	-378	51	1024
20190417	11:06:00	S2B	2.09	2.05	I	E	-23	84	1017
20190419	10:56:00	S2A	3.74	3.62	I	E	-142	105	1025
20190514	10:56:00	S2B	5.75	5.59	I	F	130	56	1029
20190601	11:06:00	S2A	2.82	2.83	I	E	-25	69	1012
20190621	11:06:00	S2A	8.59	8.51	D	E	-253	70	1021
20190626	11:06:00	S2B	9.25	9.18	dws	F	273	40	1020
20190628	10:56:00	S2A	6.03	5.98	I	F	133	44	1018
20190703	10:56:00	S2B	4.71	4.61	I	E	-150	88	1023
20190706	11:06:00	S2B	9.56	9.56	D	E	-279	92	1013
20190708	10:56:00	S2A	11.51	11.45	D	E	-379	77	1019
20190711	11:07:00	S2A	8.4	8.39	D	F	207	58	1014
20190716	11:06:00	S2B	4	3.95	I	E	-97	73	1018
20190723	10:56:00	S2B	10.18	10.16	D	E	-332	57	1015
20190802	10:56:00	S2B	5.82	5.76	I	E	-189	100	1019
20190807	10:56:00	S2A	11.63	11.66	D	E	-402	72	1010
20190820	11:06:00	S2A	9.06	8.94	D	E	-272	73	1025
20190822	10:56:00	S2B	10.29	10.16	D	E	-339	58	1026
20190827	10:56:00	S2A	4.68	4.67	I	F	68	51	1014
20190914	11:07:00	S2B	4.43	4.26	I	E	-122	82	1030
20190916	10:57:00	S2A	6.61	6.51	hws	E	-203	85	1023
20190919	11:07:00	S2A	9.12	8.97	D	E	-276	72	1028
20190921	10:58:00	S2B	10.13	10.17	D	E	-351	52	1009
20191021	11:01:00	S2B	9.97	9.91	D	E	-389	45	1019
20191108	11:13:00	S2A	4.92	4.99	I	F	64	51	1006
20191203	11:13:00	S2B	9.74	9.59	D	E	-355	45	1028
20191223	11:14:00	S2B	3.51	3.48	D	F	46	71	1016
20191230	11:04:00	S2B	9.06	8.87	D	F	-271	73	1032
20200119	11:03:00	S2B	8.79	8.5	D	F	218	56	1042
20200122	11:13:00	S2B	3.42	3.2	I	F	4	65	1035
20200206	11:13:00	S2A	4.28	4.12	I	F	47	52	1029
20200317	11:08:00	S2A	9.53	9.35	dws	F	290	45	1031
20200324	10:57:00	S2A	4.61	4.5	I	E	-149	85	1024
20200327	11:07:00	S2A	7.34	7.27	D	E	-226	85	1020
20200401	11:06:00	S2B	9.59	9.5	D	E	-391	40	1022
20200411	11:06:00	S2B	9.16	9.08	D	E	-271	104	1021
20200423	10:56:00	S2A	4.59	4.55	I	E	-150	84	1017
20200518	10:56:00	S2B	4.3	4.17	I	F	57	51	1026
20200526	11:07:00	S2A	8.11	7.89	D	E	-243	74	1035
20200528	10:56:00	S2B	10.07	9.9	D	E	-333	60	1030
20200531	11:06:00	S2B	8.7	8.66	I	F	233	51	1017
20200602	10:57:00	S2A	3.88	3.83	I	F	75	67	1018
20200622	10:57:00	S2A	5.48	5.34	I	E	-166	79	1027
20200720	11:06:00	S2B	3.9	3.82	I	E	-97	74	1021
20200722	10:57:00	S2A	6.44	6.34	I	E	-199	87	1023
20200730	11:06:00	S2B	6.47	6.43	I	F	147	53	1017
20200804	11:07:00	S2A	5.06	5	I	E	-154	83	1019
20200806	10:56:00	S2B	7.77	7.73	D	E	-234	83	1017
20200809	11:06:00	S2B	9.85	9.82	D	E	-305	65	1016
20200908	11:06:00	S2B	9.73	9.59	D	E	-298	61	1027
20200913	11:07:00	S2A	6.58	6.47	I	F	140	35	1024
20201104	11:02:00	S2B	7.58	7.38	D	E	-231	75	1033
20201112	11:13:00	S2A	3.81	3.75	I	F	60	71	1019
20201129	11:04:00	S2A	3.49	3.39	I	E	-77	75	1023
20201217	11:14:00	S2B	7.38	7.31	D	E	-226	92	1020
20201219	11:05:00	S2A	10.17	10.21	D	E	-314	72	1009
20210210	11:12:00	S2A	3.21	3.23	I	E	-64	76	1011
20210227	11:00:00	S2A	4.41	4.15	I	E	-148	91	1039
20210307	11:08:00	S2B	9.36	9.24	D	F	269	49	1025
20210329	10:57:00	S2A	4.82	4.66	I	E	-176	107	1029
20210401	11:06:00	S2A	9.67	9.61	D	E	-283	102	1019
20210413	10:56:00	S2B	5.66	5.46	D	E	-184	88	1033
20210423	10:56:00	S2B	4.65	4.55	I	F	76	49	1023
20210518	10:56:00	S2A	9.56	9.52	D	E	-338	47	1017
20210531	11:06:00	S2A	10.46	10.41	D	E	-331	70	1018
20210605	11:06:00	S2B	5.63	5.49	I	F	118	49	1027
20210615	11:06:00	S2B	9.2	9.12	D	E	-282	63	1021
20210717	10:56:00	S2A	10.79	10.66	D	F	322	63	1026
20210722	10:56:00	S2B	3.03	2.96	I	E	-23	72	1020
20210814	11:06:00	S2B	10.98	10.9	D	E	-285	76	1021
20210930	10:58:00	S2B	8.6	8.46	dws	F	305	26	1027
20211008	11:10:00	S2A	5.81	5.66	hws	E	-196	108	1028
20211028	11:12:00	S2A	9.08	9.1	D	E	-339	34	1011
20211122	11:13:00	S2B	6.52	6.41	D	E	-194	74	1024
20211124	11:04:00	S2A	8.46	8.38	D	E	-259	60	1021
20211217	11:15:00	S2A	3.42	3.2	I	E	-32	68	1035
20220101	11:14:00	S2B	2.61	2.54	I	E	-22	81	1020
20220205	11:13:00	S2A	10.08	9.94	D	E	-297	89	1027
20220227	10:59:00	S2B	4.49	4.4	I	F	61	52	1022
20220307	11:09:00	S2A	9.84	9.77	D	E	-292	80	1020
20220327	11:07:00	S2A	6.91	6.77	I	F	168	41	1027
20220416	11:06:00	S2A	3.38	3.24	I	E	-116	93	1027
20220521	11:06:00	S2B	10.57	10.47	D	E	-346	67	1023
20220528	10:56:00	S2B	3	2.89	I	E	-42	72	1024
20220612	10:57:00	S2A	2.76	2.64	I	E	-2	73	1025
20220615	11:07:00	S2A	4.66	4.62	I	E	-156	95	1017
20220617	10:56:00	S2B	8.78	8.7	D	E	-261	92	1021
20220710	11:06:00	S2B	5.44	5.32	I	F	115	55	1025
20220712	10:57:00	S2A	2.97	2.88	I	E	-35	75	1022
20220715	11:07:00	S2A	6.17	6.07	I	E	-197	97	1023
20220717	10:56:00	S2B	10.15	10.05	D	E	-398	93	1023
20220720	11:06:00	S2B	11	10.95	D	E	-404	61	1018
20220730	11:06:00	S2B	6.05	5.97	I	E	-176	75	1021
20220806	10:56:00	S2B	10.09	9.95	D	F	292	53	1027
20220809	11:06:00	S2B	4.37	4.25	I	F	60	57	1025
20220811	10:57:00	S2A	3.51	3.46	I	E	-88	83	1018
20220826	10:56:00	S2B	4.17	4.1	I	E	-97	70	1020
20220829	11:06:00	S2B	6.34	6.3	I	E	-198	87	1017
20220918	11:07:00	S2B	9.46	9.36	D	E	-385	32	1023
20221020	11:01:00	S2A	6.61	6.66	I	F	126	31	1008
20221112	11:13:00	S2A	7.56	7.43	D	E	-225	71	1026
20221119	11:04:00	S2A	6.41	6.38	I	F	131	42	1016
20221129	11:04:00	S2A	10.69	10.62	D	E	-357	67	1020
20221209	11:05:00	S2A	5.22	5.28	D	E	-151	78	1007
20221227	11:14:00	S2B	9.88	9.75	D	E	-296	89	1026
20221229	11:05:00	S2A	11.38	11.41	D	E	-398	69	1010
20230111	11:15:00	S2A	8.44	8.38	D	E	-266	69	1019
20230116	11:13:00	S2B	9.72	9.93	dws	F	282	45	992
20230121	11:14:00	S2A	3.18	3.01	I	E	-84	85	1030
20230123	11:14:00	S2A	5.85	5.63	I	E	-195	103	1035
20230205	11:12:00	S2B	4.41	4.1	I	E	-115	72	1044
20230207	11:10:00	S2A	6.02	5.79	I	E	-186	81	1036
20230215	11:11:00	S2B	8.97	8.84	D	F	252	42	1026
20230227	11:01:00	S2A	10.37	10.23	D	E	-397	47	1027
20230302	11:10:00	S2A	6.33	6.23	I	E	126	30	1023
20230319	10:58:00	S2A	2.87	2.81	I	E	-15	70	1019
20230327	11:07:00	S2B	10.13	10	D	E	-398	71	1026
20230401	11:06:00	S2A	5.34	5.38	I	F	68	36	1009
20230403	10:56:00	S2B	3.46	3.32	I	E	-40	62	1027
20230408	10:56:00	S2B	6.89	6.78	D	E	-220	92	1024
20230503	10:56:00	S2B	2.98	2.95	D	E	-37	68	1016
20230523	10:56:00	S2B	8.45	8.34	D	E	-246	69	1024
